# Supplementary figures and images for: Gld2-catalyzed 3′ monoadenylation of miRNAs in the hippocampus has no detectable effect on their stability or on animal behavior
Source: PubMed Central journal article supplement — RNA. 2016 Oct;22(10):1492–9. doi: 10.1261/rna.056937.116 (PMC5029448; doi:10.1261/rna.056937.116), 2016-10

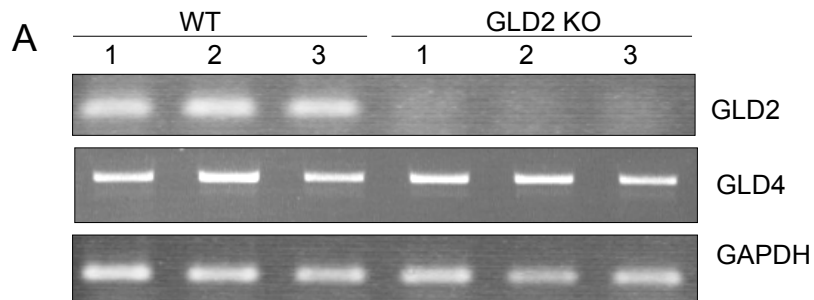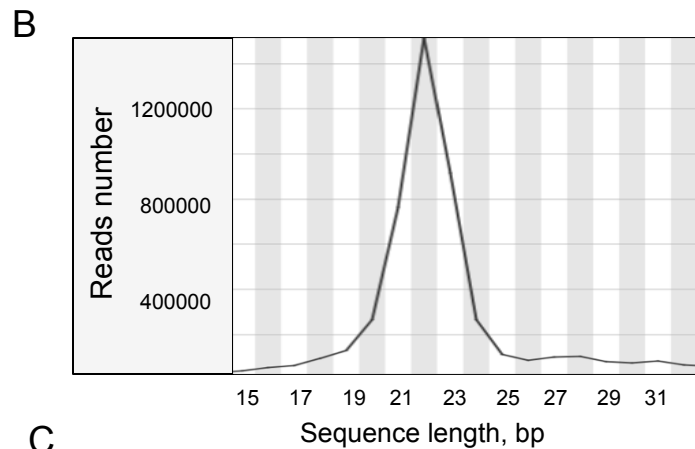

**C**

| Sample  | Total sequences (N) | Average (N) |
|---------|---------------------|-------------|
| GLD2KO1 | 3,350,872           | 3,505,024   |
| GLD2KO2 | 3,583,144           |             |
| GLD2KO3 | 4,036,884           |             |
| GLD2KO4 | 3,534,129           |             |
| GLD2KO5 | 3,229,655           |             |
| GLD2KO6 | 3,295,460           |             |
| WT1     | 4,381,807           | 4,519,562   |
| WT2     | 4,112,351           |             |
| WT3     | 3,005,664           |             |
| WT4     | 5,281,610           |             |
| WT5     | 5,330,482           |             |
| WT6     | 5,005,456           |             |

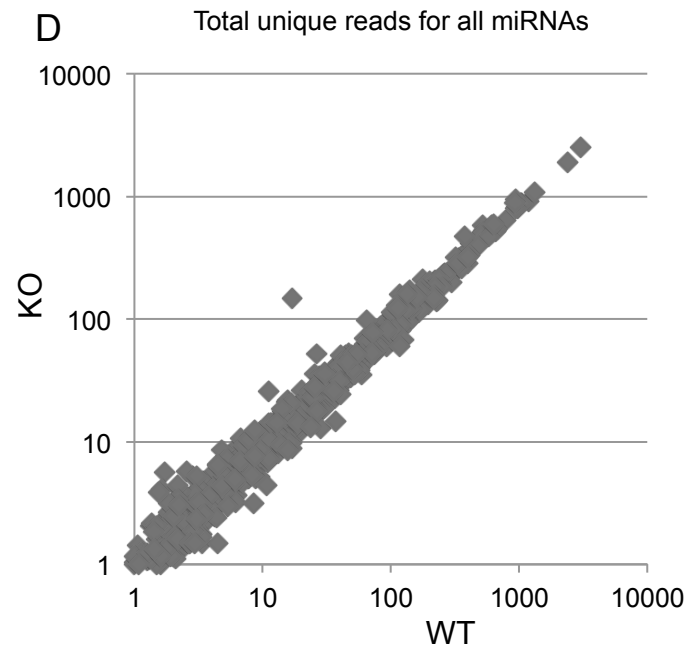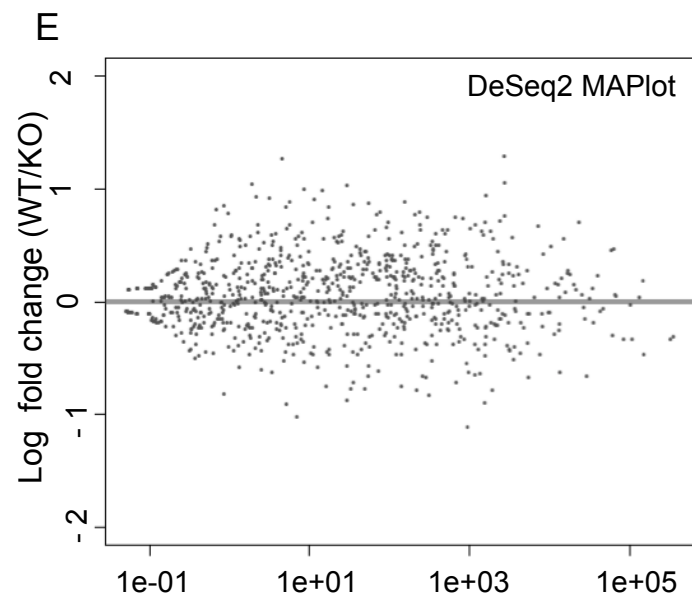

Supplement: supp_056937.116_Supplemental_Figure1.pdf [file supp_056937.116_Supplemental_Figure1.pdf]

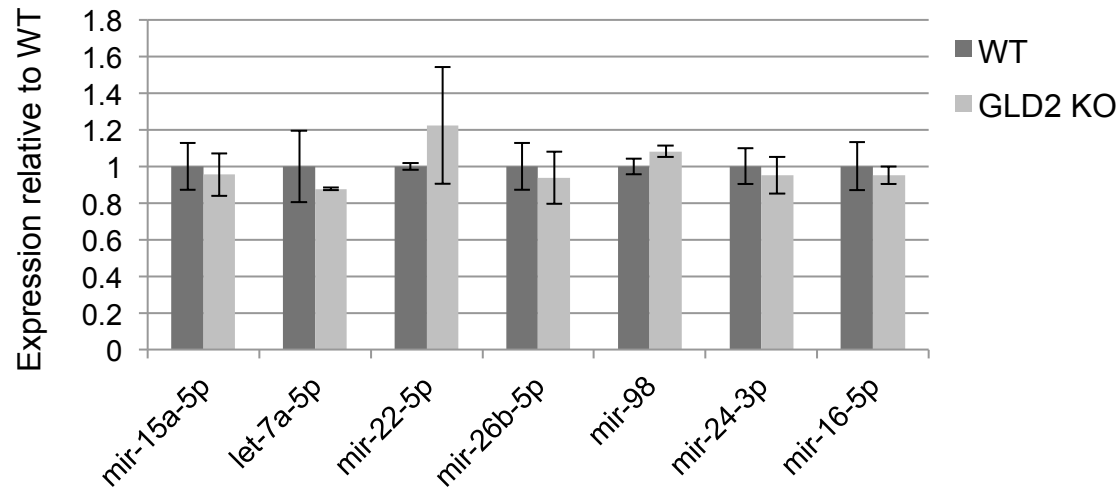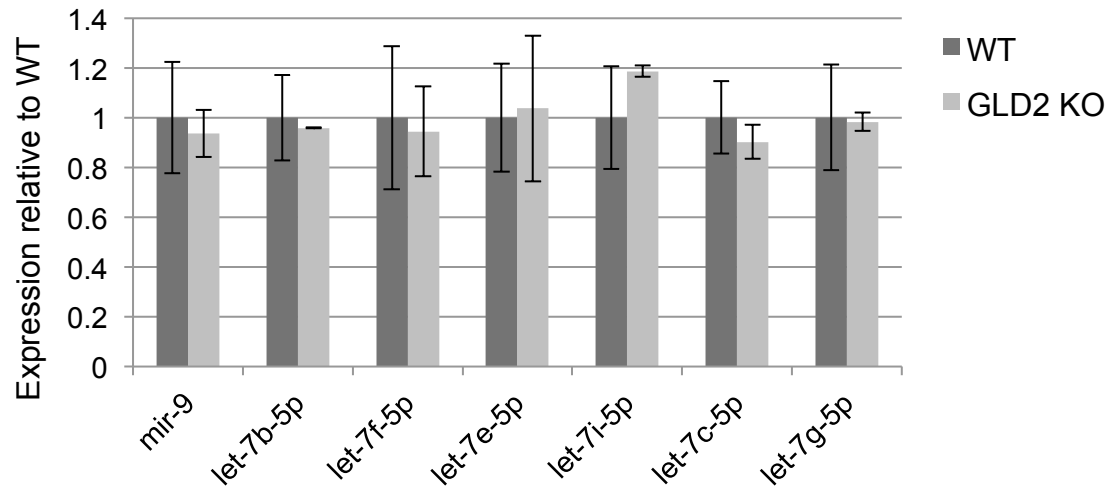

Supplementary Fig.2

Supplement: supp_056937.116_Supplemental_Figure2.pdf [file supp_056937.116_Supplemental_Figure2.pdf]

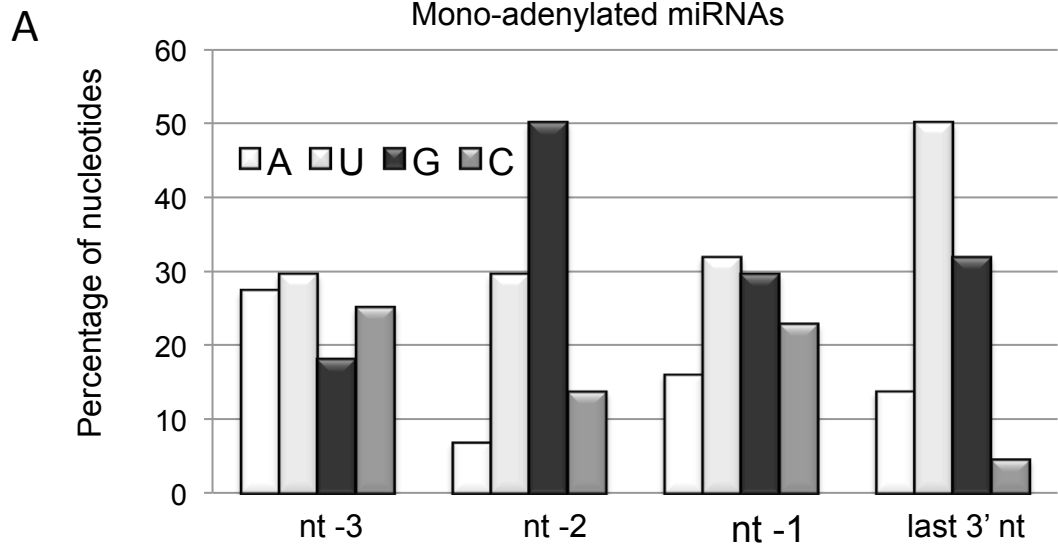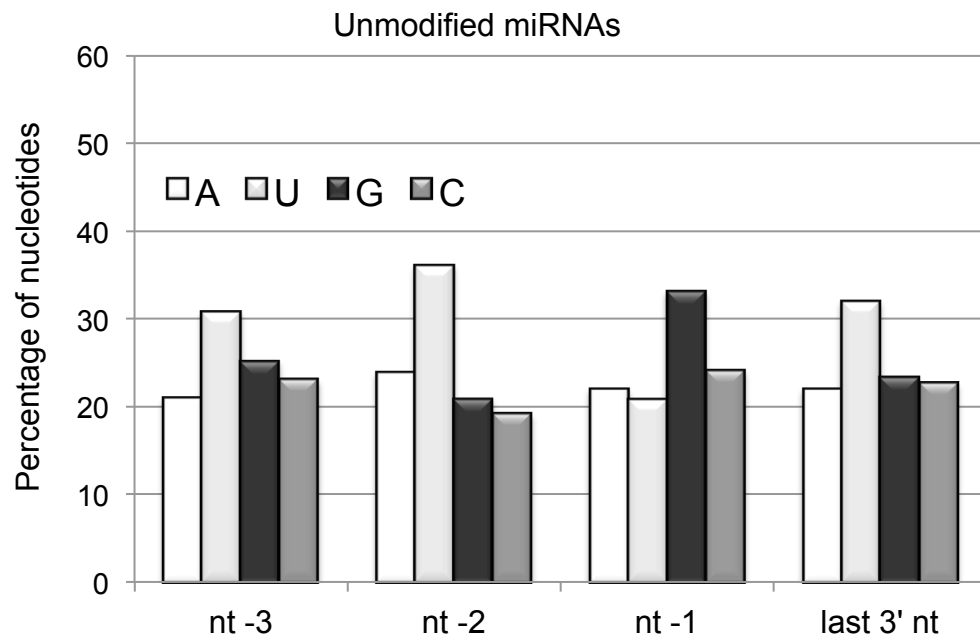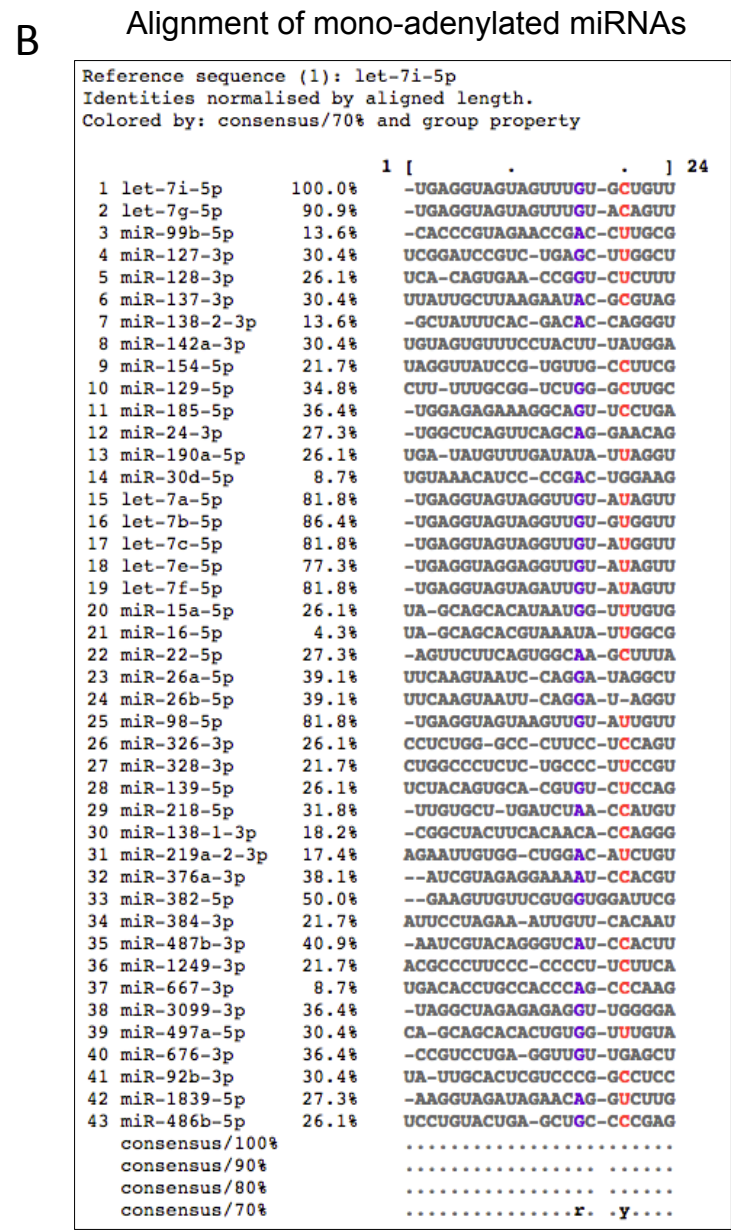

Supplementary Fig.3

Supplement: supp_056937.116_Supplemental_Figure3.pdf [file supp_056937.116_Supplemental_Figure3.pdf]
